# Supplementary material
Source: PubMed Central journal article supplement (PMC3697513)
Supplement: AEM.00239-13_zam999104472so1.pdf [file AEM.00239-13_zam999104472so1.pdf]

## TABLE

Table S1 Oligonucleotide primers for the construction process.

| Name    | Primers 5'→3'                                           |
|---------|---------------------------------------------------------|
| CUT-F   | GTAATCCATATGGCCAACCCCTACGAGCGC (NdeI underlined)        |
| CUT-R   | CATCTCGAGAGAATTCGGGAACGGGCAGGTGGAGCG (EcoRI underlined) |
| S130A-F | GGCGGTCATGGGCCACgCAATGGGCGGGCGGCGGC                     |
| S130A-R | GCCGCCGCCGCCATTGcGTGGCCCATGACCGCC                       |

## FIGURES

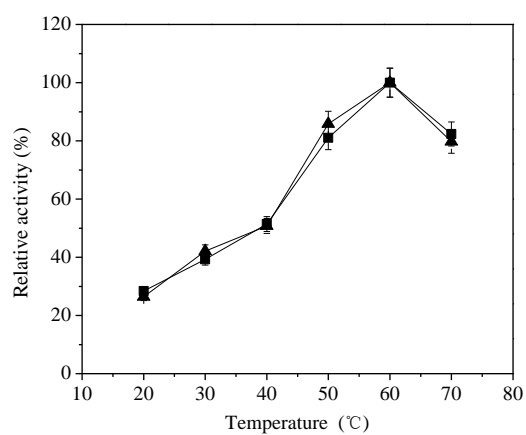

(A)

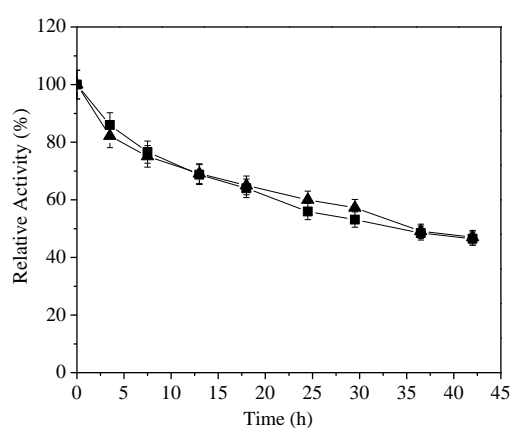

(B)

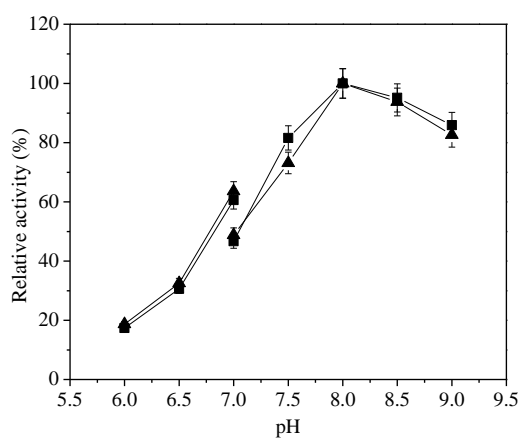

(C)

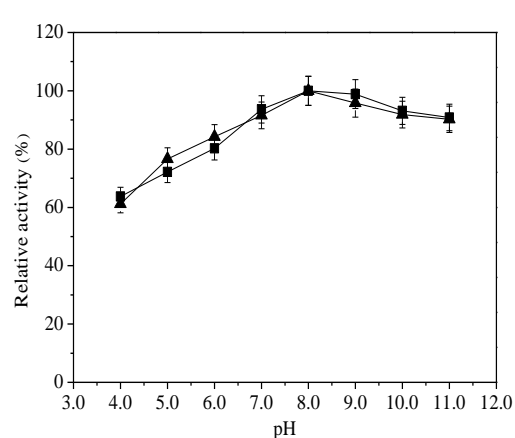

(D)

Figure S1. Effects of pH and temperature on activity and stability of cutinases. ▲, cutinase<sup>NS</sup>; ■, wild-type cutinase. (A) Temperature optimum; (B), Thermostability at 60 °C; (C), pH optimum; (D), pH stability.

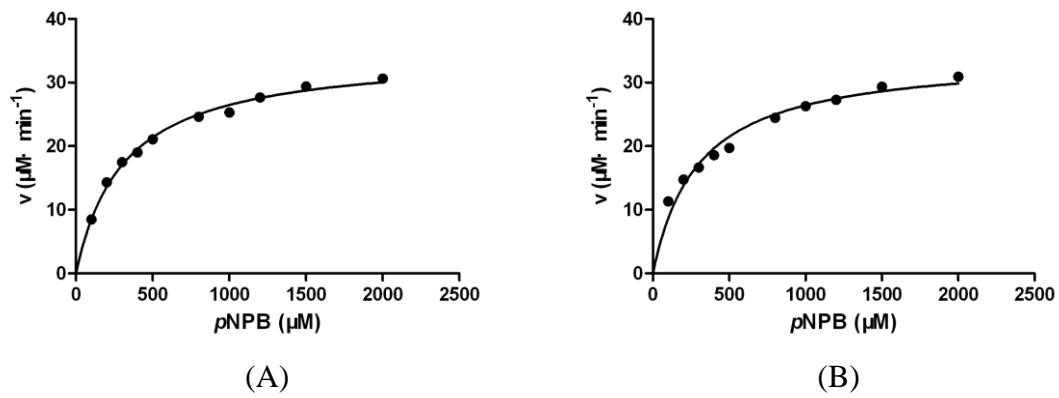

Figure S2. Michaelis-Menten curves of cutinases using  $p$ NPB as substrate. (A) cutinase<sup>NS</sup>; (B), wild-type cutinase.
